# Supplementary material for: Mesenchymal stem cells/multipotent stromal cells (MSCs) are glycolytic and thus glucose is a limiting factor of in vitro models of MSC starvation
Source: PubMed Central journal article supplement (PMC5134064; doi:10.1186/s13287-016-0436-7), 2016-12-01

Fig S2

A)

| Nutrient      | Concentration (uMol/dL) |       |       |        |       |       |            |       |       |
|---------------|-------------------------|-------|-------|--------|-------|-------|------------|-------|-------|
|               | Control                 |       |       | -Serum |       |       | -Nutrients |       |       |
|               | 24 hr                   | 48 hr | 72 hr | 24 hr  | 48 hr | 72 hr | 24 hr      | 48 hr | 72 hr |
| Glutamine     | 206                     | 91    | 15    | 228    | 156   | 110   | 74         | nd    | nd    |
| Proline       | 15                      | 29    | 38    | 15     | 32    | 44    | 12         | 21    | 28    |
| Glycine       | 60                      | 81    | 92    | 60     | 83    | 96    | 50         | 65    | 74    |
| Alanine       | 93                      | 124   | 121   | 81     | 114   | 119   | 51         | 57    | 33    |
| Leucine       | 50                      | 54    | 53    | 55     | 62    | 66    | 55         | 53    | 47    |
| Tyrosine      | 31                      | 30    | 31    | 35     | 34    | 35    | 35         | 35    | 34    |
| Lysine        | 60                      | 60    | 60    | 69     | 77    | 81    | 69         | 76    | 81    |
| Histidine     | 15                      | 15    | 14    | 17     | 17    | 18    | 17         | 17    | 18    |
| Aspartic Acid | 9                       | 6     | 4     | 8      | 5     | 3     | 8          | 5     | 3     |

B)

| Oxygen flux (pM/10 <sup>4</sup> cells/min) |            |           |           |
|--------------------------------------------|------------|-----------|-----------|
| height of media                            | 20% oxygen | 5% oxygen | 1% oxygen |
| 0.1cm                                      | 1800       | 450       | 90        |
| 0.2cm                                      | 900        | 225       | 45        |
| 0.5cm                                      | 360        | 90        | 18        |

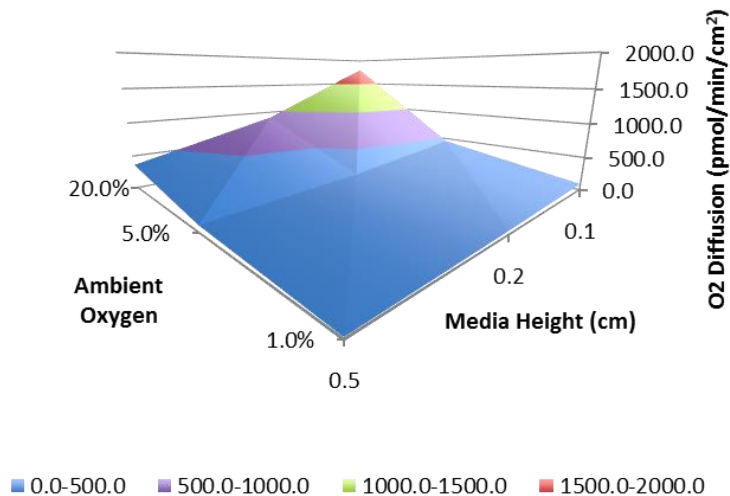

Supplement: 13287_2016_436_MOESM2_ESM.pdf [file 13287_2016_436_MOESM2_ESM.pdf]
