# Supplementary material for: Mesenchymal stem cells/multipotent stromal cells (MSCs) are glycolytic and thus glucose is a limiting factor of in vitro models of MSC starvation
Source: PubMed Central journal article supplement (PMC5134064; doi:10.1186/s13287-016-0436-7), 2016-12-01

Fig S3

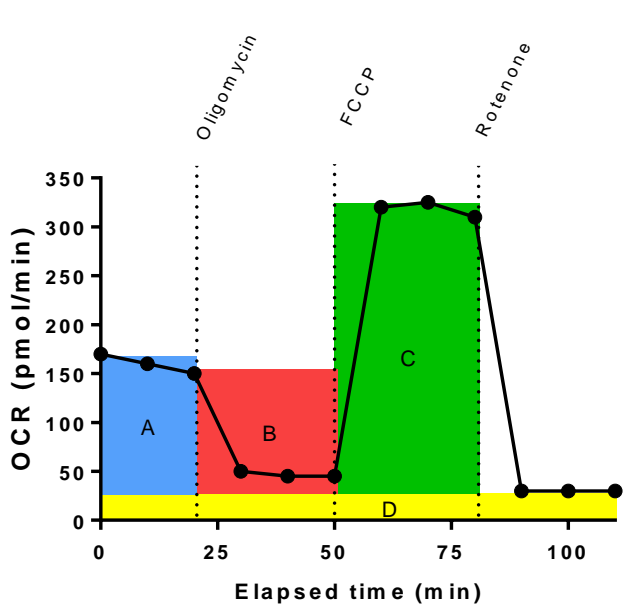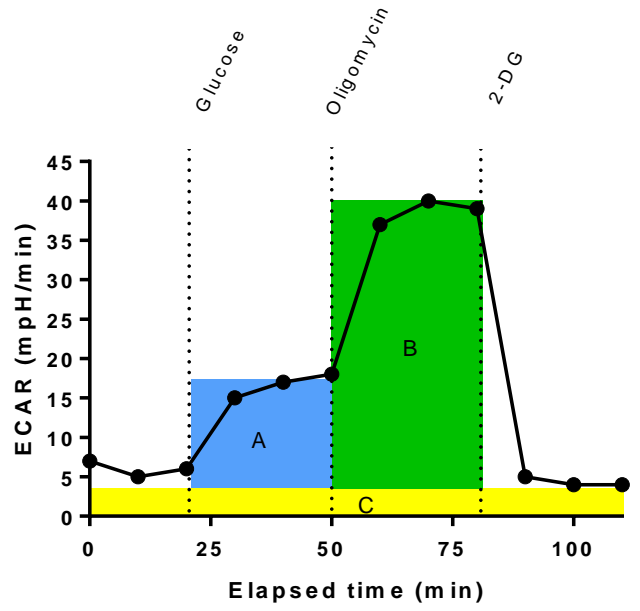

Supplement: 13287_2016_436_MOESM3_ESM.pdf [file 13287_2016_436_MOESM3_ESM.pdf]
